# Supplementary material for: Investigation of Acid Tolerance Mechanism of Acetobacter pasteurianus under Different Concentrations of Substrate Acetic Acid Based on 4D Label-Free Proteomic Analysis
Source: MDPI journal article supplement (doi:10.3390/foods12244471), 2023-12-13
Supplement: s1 [file s1]

Supplementary materials for:

**Investigation of acid tolerance mechanism of *Acetobacter pasteurianus* under different concentrations of substrate acetic acid based on 4D label-free proteomic analysis**

Tian Li<sup>1</sup>, Xinwei Wang<sup>1</sup>, Chunyan Li<sup>1</sup>, Qingquan Fu<sup>1</sup>, Xuewei Shi<sup>1</sup>, Bin Wang<sup>1,\*</sup>

<sup>1</sup> Food college, Shihezi University, Shihezi 832000, Xinjiang Uygur Autonomous Region, P. R. China.

\* Corresponding authors

E-mail addresses: binwang0228@shzu.edu.cn

Tel.: 86-0993-2058093

## Catalog

|                                                                                                                                  |          |
|----------------------------------------------------------------------------------------------------------------------------------|----------|
| <b>Supplementary Tables .....</b>                                                                                                | <b>1</b> |
| Table S1. Growth of <i>Acetobacter pasteurianus</i> in 24 hours under different concentrations of the substrate acetic acid..... | 1        |
| Table S2. The proteins enriched in the ribosome KEGG pathway of each comparison group. ....                                      | 2        |
| <b>Supplementary Figures .....</b>                                                                                               | <b>3</b> |
| Figure S1. Overview of protein identification. ....                                                                              | 3        |
| Figure S2. The distribution of peptides length (A) and peptides in proteins number (B). ....                                     | 4        |
| Figure S3. The relative standard deviation (RSD) analysis in different samples. ....                                             | 5        |

## Supplementary Tables

**Table S1.** Growth of *Acetobacter pasteurianus* in 24 hours under different concentrations of the substrate acetic acid

| Time (h) | acid                      |                           |                           |                                 |                          |                          |
|----------|---------------------------|---------------------------|---------------------------|---------------------------------|--------------------------|--------------------------|
|          | OD <sub>600</sub>         |                           |                           | Increased acetic acid (g/100mL) |                          |                          |
|          | 0                         | 3%                        | 6%                        | 0                               | 3%                       | 6%                       |
| 6        | 0.003±0.0015 <sup>d</sup> | 0.003±0.0015 <sup>c</sup> | 0.003±0.0010 <sup>a</sup> | 0.02±0.0058 <sup>d</sup>        | 0.01±0.0144 <sup>c</sup> | 0.02±0.0115 <sup>a</sup> |
| 12       | 0.051±0.0062 <sup>c</sup> | 0.003±0.0015 <sup>c</sup> | 0.003±0.0012 <sup>a</sup> | 0.13±0.0265 <sup>c</sup>        | 0.02±0.0058 <sup>c</sup> | 0.02±0.0058 <sup>a</sup> |
| 18       | 0.487±0.0305 <sup>b</sup> | 0.147±0.0126 <sup>b</sup> | 0.004±0.0010 <sup>a</sup> | 0.45±0.0351 <sup>b</sup>        | 0.21±0.0200 <sup>b</sup> | 0.01±0.0058 <sup>a</sup> |
| 24       | 0.618±0.0195 <sup>a</sup> | 0.205±0.0282 <sup>a</sup> | 0.003±0.0020 <sup>a</sup> | 0.50±0.0115 <sup>a</sup>        | 0.40±0.0404 <sup>a</sup> | 0.01±0.0058 <sup>a</sup> |

**Table S2.** The proteins enriched in the ribosome KEGG pathway of each comparison group.

| Protein accession | Protein description                  | Gene name | P3-L/P0-L Fold change | Regulated type | P6-L/P0-L Fold change | Regulated type | P3-E/P0-E Fold change | Regulated type | P6-E/P0-E Fold change | Regulated type |
|-------------------|--------------------------------------|-----------|-----------------------|----------------|-----------------------|----------------|-----------------------|----------------|-----------------------|----------------|
| fig_HN.1092       | Small ribosomal subunit protein bS20 | rpsT      | 1.27                  |                | 1.55                  | up             | 1.49                  |                | 2.54                  | up             |
| fig_HN.1320       | Large ribosomal subunit protein bL20 | rplT      | 0.83                  |                | 0.40                  | down           | 1.05                  |                | 1.51                  | up             |
| fig_HN.1321       | Large ribosomal subunit protein bL35 | rpmI      | 1.18                  |                | 2.49                  | up             | 1.04                  |                | 3.27                  | up             |
| fig_HN.1362       | Small ribosomal subunit protein bS18 | rpsR      | 1.23                  |                | 1.54                  | up             | 1.44                  |                | 1.57                  | up             |
| fig_HN.1408       | Large ribosomal subunit protein bL17 | rplQ      | 1.40                  |                | 1.87                  | up             | 1.20                  |                | 1.74                  | up             |
| fig_HN.1414       | Large ribosomal subunit protein uL15 | rplO      | 1.52                  | up             | 2.10                  | up             | 1.37                  |                | 1.76                  | up             |
| fig_HN.1416       | Small ribosomal subunit protein uS5  | rpsE      | 1.08                  |                | 0.97                  |                | 1.43                  |                | 2.22                  | up             |
| fig_HN.1417       | Large ribosomal subunit protein uL18 | rplR      | 1.51                  | up             | 3.22                  | up             | 1.68                  | up             | 2.21                  | up             |
| fig_HN.1418       | Large ribosomal subunit protein uL6  | rplF      | 1.41                  |                | 2.24                  | up             | 1.29                  |                | 1.58                  | up             |
| fig_HN.1423       | Large ribosomal subunit protein uL14 | rplN      | 1.56                  | up             | 2.15                  | up             | 1.36                  |                | 1.70                  | up             |
| fig_HN.1424       | Small ribosomal subunit protein uS17 | rpsQ      | 1.27                  |                | 1.71                  | up             | 1.37                  |                | 1.53                  | up             |
| fig_HN.1426       | Large ribosomal subunit protein uL16 | rplP      | 1.11                  |                | 1.15                  |                | 1.48                  |                | 2.14                  | up             |
| fig_HN.1428       | Large ribosomal subunit protein uL22 | rplV      | 1.12                  |                | 1.46                  |                | 1.26                  |                | 1.70                  | up             |
| fig_HN.1430       | Large ribosomal subunit protein uL2  | rplB      | 0.77                  |                | 0.33                  | down           | 1.68                  | up             | 3.34                  | up             |
| fig_HN.1432       | Large ribosomal subunit protein uL4  | rplD      | 1.55                  | up             | 2.03                  | up             | 1.41                  |                | 1.76                  | up             |
| fig_HN.1433       | Large ribosomal subunit protein uL3  | rplC      | 1.04                  |                | 1.27                  |                | 1.14                  |                | 1.51                  | up             |
| fig_HN.1436       | Small ribosomal subunit protein uS12 | rpsL      | 1.00                  |                | 0.68                  |                | 1.17                  |                | 2.57                  | up             |
| fig_HN.1442       | Large ribosomal subunit protein uL10 | rplJ      | 1.34                  |                | 1.80                  | up             | 1.35                  |                | 1.62                  | up             |
| fig_HN.2246       | Large ribosomal subunit protein bL36 | rpmJ      | 1.43                  |                | 2.73                  | up             | 2.02                  | up             | 2.61                  | up             |
| fig_HN.3263       | Small ribosomal subunit protein bS16 | rpsP      | 1.30                  |                | 1.74                  | up             | 1.45                  |                | 1.67                  | up             |
| fig_HN.3266       | Large ribosomal subunit protein bL19 | rplS      | 1.35                  |                | 1.92                  | up             | 1.15                  |                | 1.54                  | up             |
| fig_HN.3270       | Small ribosomal subunit protein bS21 | rpsU      | 0.86                  |                | 0.56                  | down           | 1.49                  |                | 2.36                  | up             |
| fig_HN.3277       | Large ribosomal subunit protein bL32 | rpmF      | 1.17                  |                | 2.43                  | up             | 0.61                  | down           | 0.44                  | down           |
| fig_HN.3316       | Large ribosomal subunit protein bL28 | rpmB      | 1.23                  |                | 1.93                  | up             | 1.55                  | up             | 1.76                  | up             |
| fig_HN.3472       | Small ribosomal subunit protein uS9  | rpsI      | 1.31                  |                | 1.58                  | up             | 1.42                  |                | 1.86                  | up             |
| fig_HN.3517       | Small ribosomal subunit protein uS15 | rpsO      | 1.44                  |                | 1.68                  | up             | 1.22                  |                | 1.67                  | up             |

Note: In each comparison group, only the proteins labeled with the type of regulation were significantly differentially expressed proteins.

**Supplementary Figures**

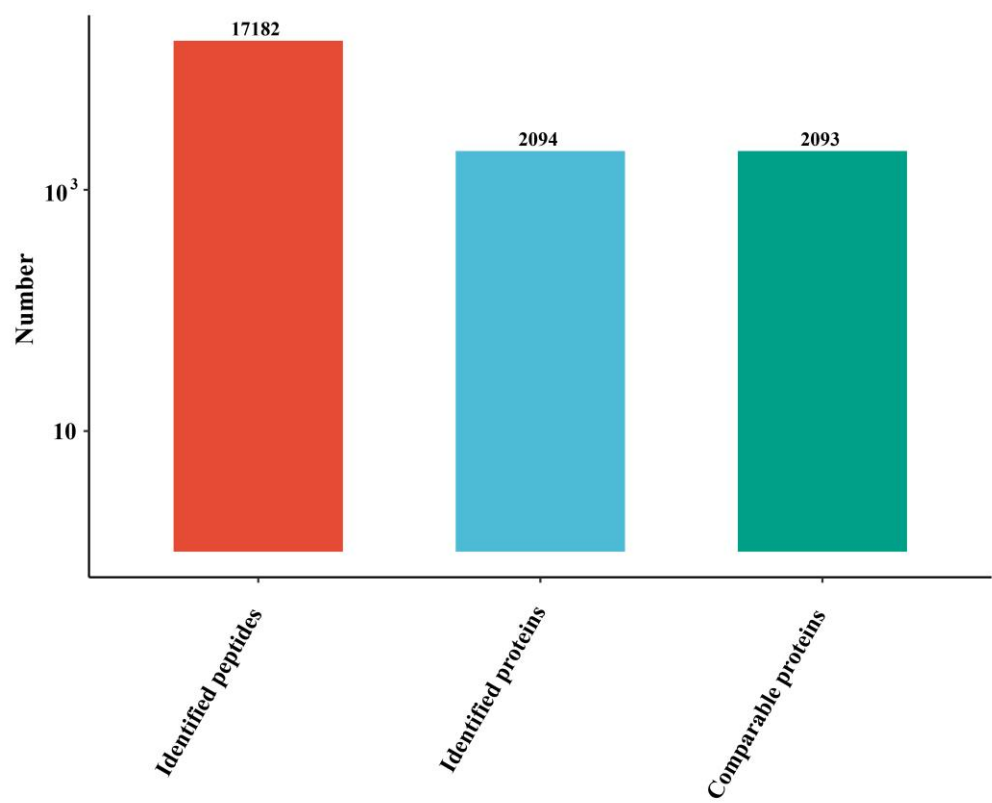

**Figure S1.** Overview of protein identification.

**A**

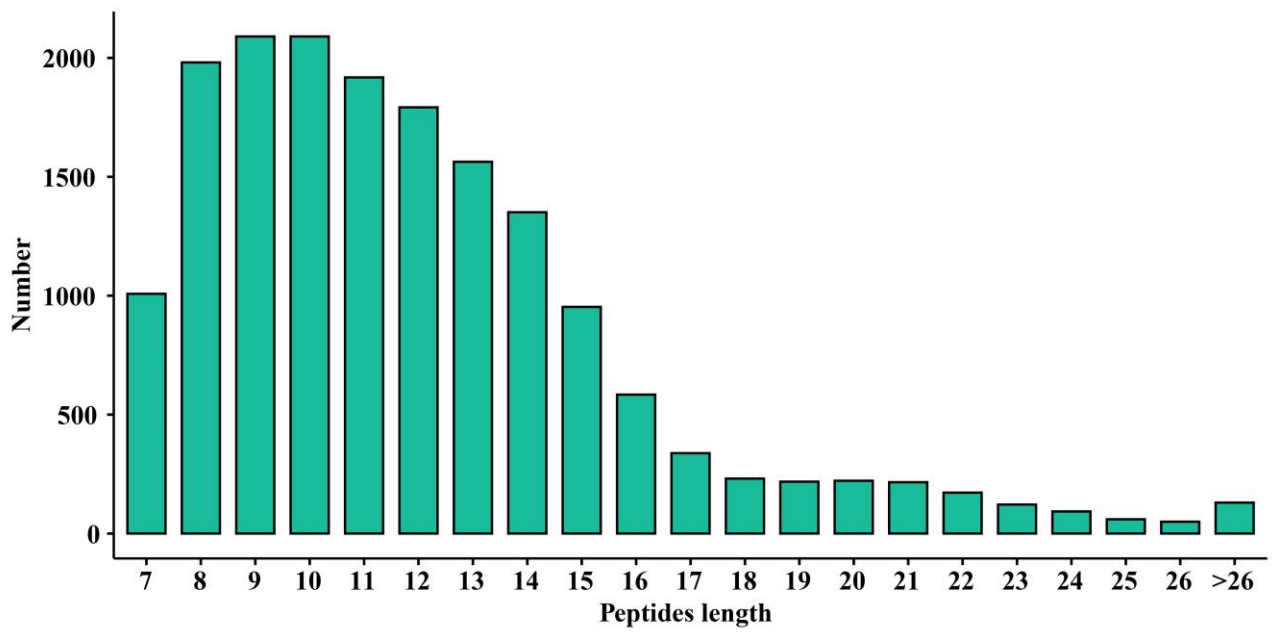

**B**

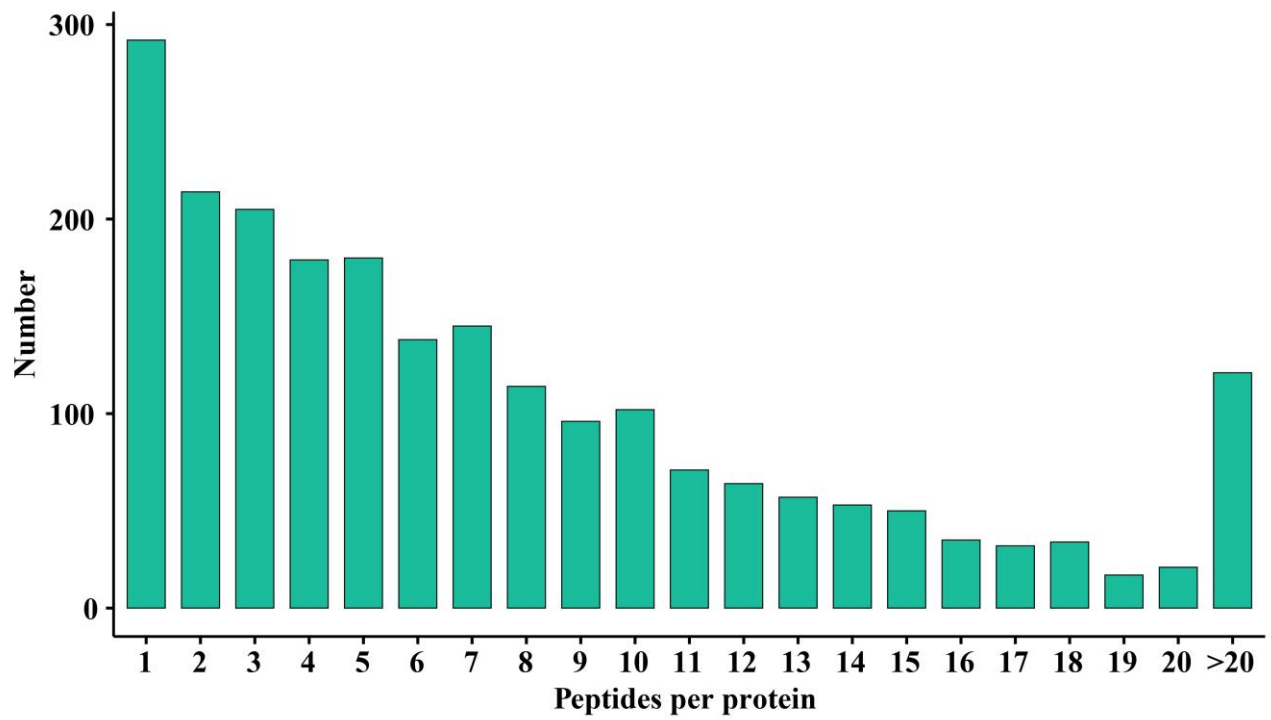

**Figure S2.** The distribution of peptides length (A) and peptides in proteins number (B).

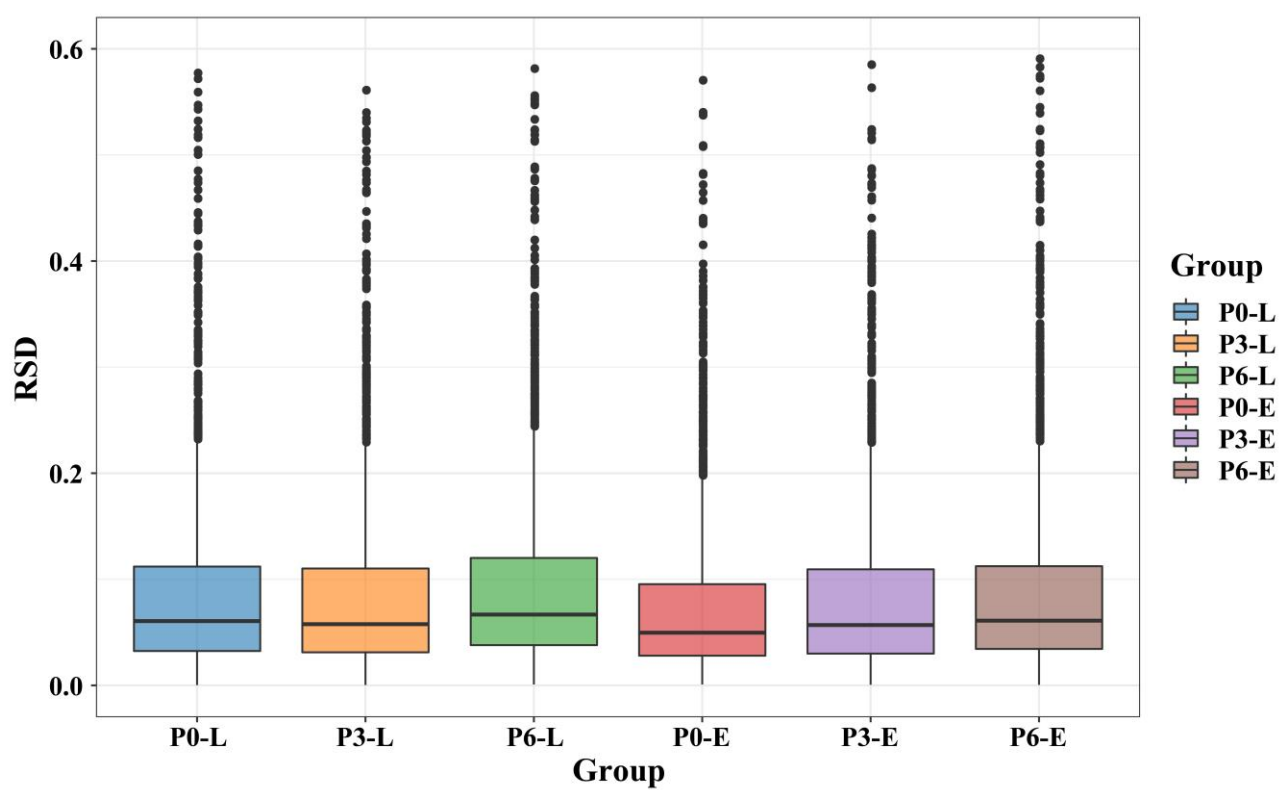

**Figure S3.** The relative standard deviation (RSD) analysis in different samples.
